# Supplementary material for: Ferroelectric nanocomposite networks with high energy storage capacitance and low ferroelectric loss by designing a hierarchical interface architecture
Source: Royal Society of Chemistry journal article supplement (doi:10.1039/c9cp03389k), 2019-01-01
Supplement: c9cp03389k1.pdf [file c9cp03389k1.pdf]

## Ferroelectric Nanocomposite Networks with High Energy Storage Capacitance and Low Ferroelectric Loss by Designing Hierarchical Interface Architecture

Yingxin Chen,<sup>a</sup> Yifeng Yue,<sup>a</sup> Jie Liu,<sup>c</sup> Jie Shu,<sup>e</sup> Aiping Liu,<sup>d</sup> Baojin Chu,<sup>c</sup> Minhui Xu,<sup>a</sup> Weizhong Xu,<sup>d</sup> Tong Chen,<sup>a</sup> Jian Zhang<sup>a\*</sup>, Qundong Shen<sup>b\*</sup>

- College of Materials & Environmental Engineering, Hangzhou Dianzi University, Hangzhou 310018, China.
- Key Laboratory of High Performance Polymer Materials and Technology of MOE, School of Chemistry & Chemical Engineering, Nanjing University, Nanjing, 210023, China
- CAS Key Laboratory of Materials for Energy Conversion and Department of Materials Science and Engineering, University of Science and Technology of China, No. 96 Jinzhai Rd., Hefei, Anhui, 230026, China
- Center for Optoelectronics Materials and Devices, Zhejiang Sci-Tech University, Hangzhou, 310018, China.
- Analysis and Testing Center, Soochow University, Suzhou, 215123, China.

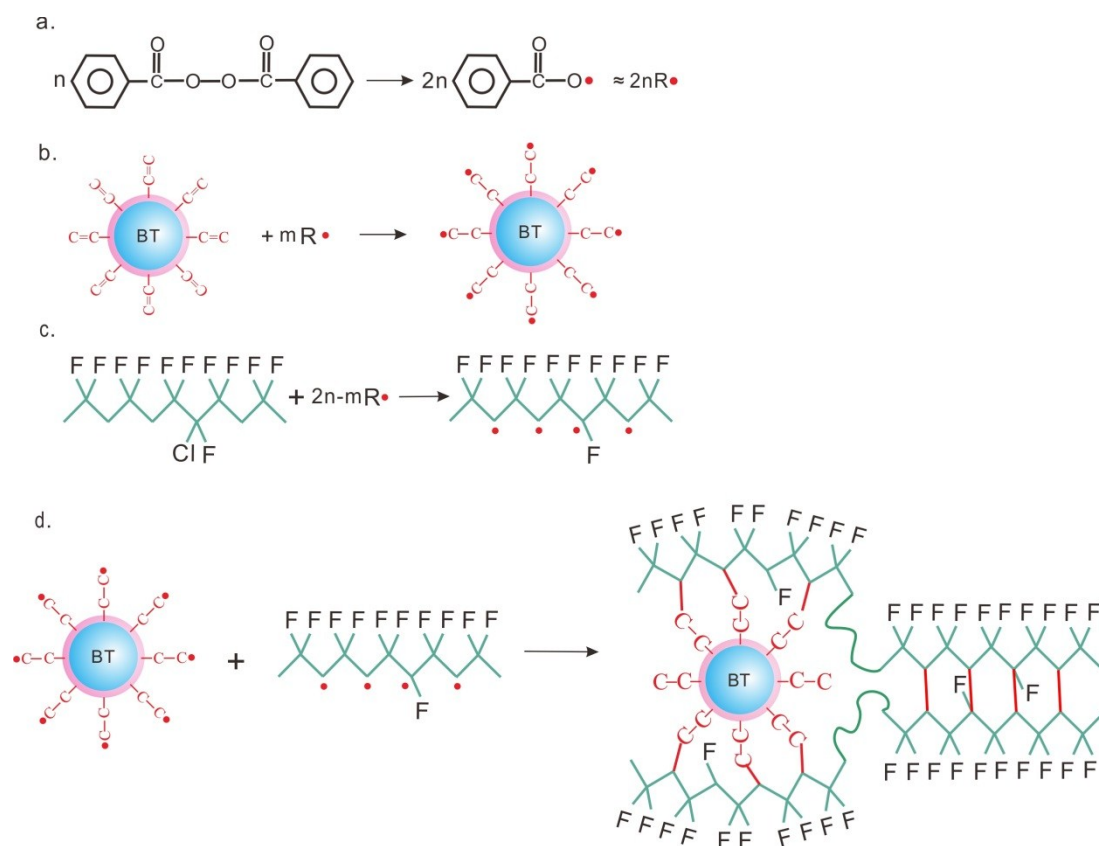

Figure S1. Schematic illustration of the mechanism of the cross-linking reactions in P(VDF-CTFE)/MPS@BT nanocomposite networks.

Table S1. Lattice constant and coherence length for the (200, 020) reflection of P(VDF-CTFE)/MPS@BT nanocomposites (B<sub>0</sub>, B<sub>5</sub>, B<sub>10</sub>, and B<sub>15</sub>) and nanocomposite networks (B<sub>10</sub>P<sub>10</sub>, and B<sub>10</sub>P<sub>15</sub>).

|                                 | $\alpha$ -phase       |                | $\beta$ -phase             |                |
|---------------------------------|-----------------------|----------------|----------------------------|----------------|
|                                 | $d, \text{\AA} (020)$ | $L, \text{nm}$ | $D, \text{\AA} (100, 200)$ | $L, \text{nm}$ |
| P(VDF-CTFE)                     | 4.48                  | 11.0           | 4.32                       | 6.7            |
| B <sub>5</sub>                  | 4.43                  | 10.3           | 4.28                       | 7.3            |
| B <sub>10</sub>                 | 4.46                  | 9.7            | 4.30                       | 8.1            |
| B <sub>15</sub>                 | 4.45                  | 8.1            | 4.29                       | 9.0            |
| B <sub>10</sub> P <sub>10</sub> | 4.43                  | 7.3            | 4.31                       | 6.2            |
| B <sub>10</sub> P <sub>15</sub> | 4.46                  | 6.5            | 4.31                       | 5.8            |

Table S2. Melting temperature ( $T_m$ ) and the relative crystallinity of the P(VDF-CTFE)/MPS@BT nanocomposites and nanocomposite networks calculated from DSC curves.

| Sample                          | $T_m$ ( $^{\circ}\text{C}$ ) | Crystallinity (%) |
|---------------------------------|------------------------------|-------------------|
| P(VDF-CTFE)                     | 173                          | 23.6              |
| B <sub>5</sub>                  | 171                          | 25.2              |
| B <sub>10</sub>                 | 172                          | 25.4              |
| B <sub>15</sub>                 | 171                          | 26.1              |
| B <sub>10</sub> P <sub>10</sub> | 169                          | 22.4              |
| B <sub>10</sub> P <sub>15</sub> | 168                          | 21.7              |

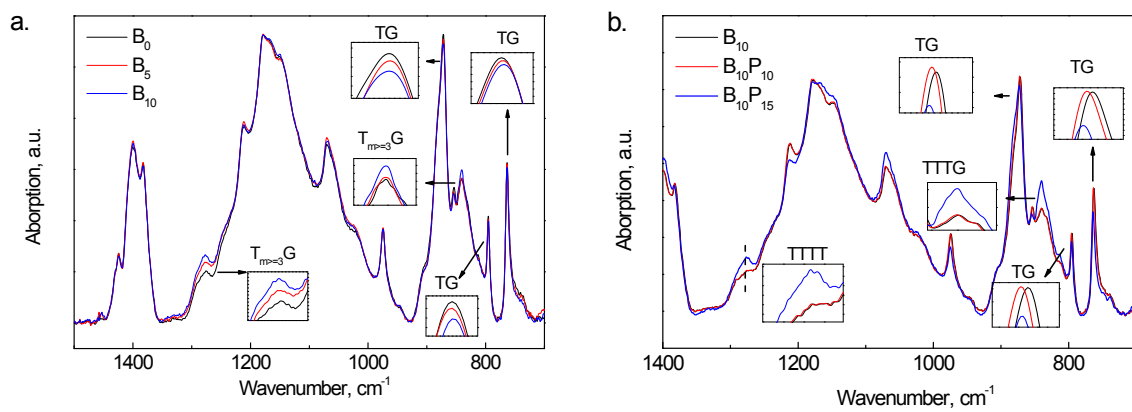

Figure S2. FTIR spectrum of (a) P(VDF-CTFE) and P(VDF-CTFE)/MPS@BT nanocomposites (B<sub>5</sub>, and B<sub>10</sub>).

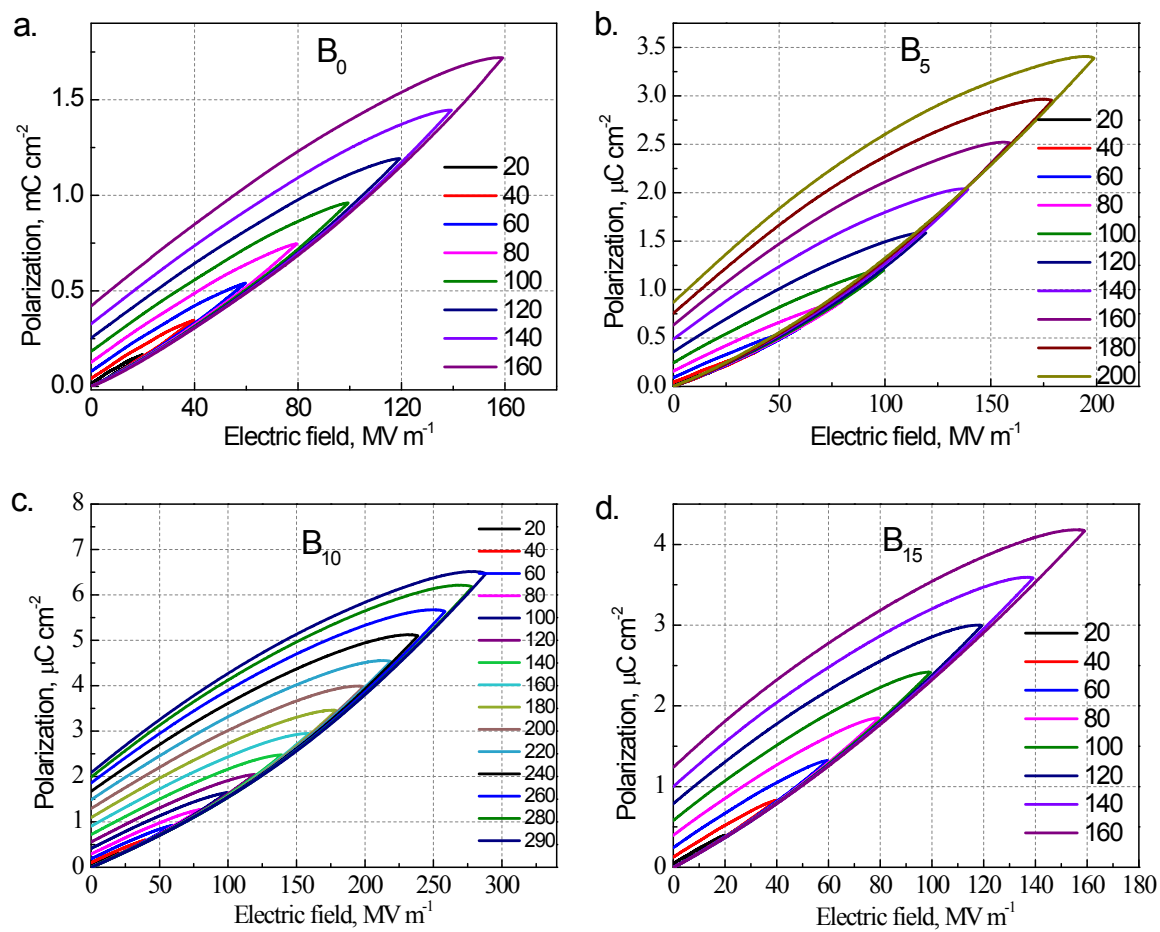

Figure S3. Unipolar D-E hysteresis loops for P(VDF-CTFE)/MPS@BT nanocomposites (a) B<sub>0</sub>, (b) B<sub>5</sub>, (c) B<sub>10</sub>, and (d) B<sub>15</sub>.

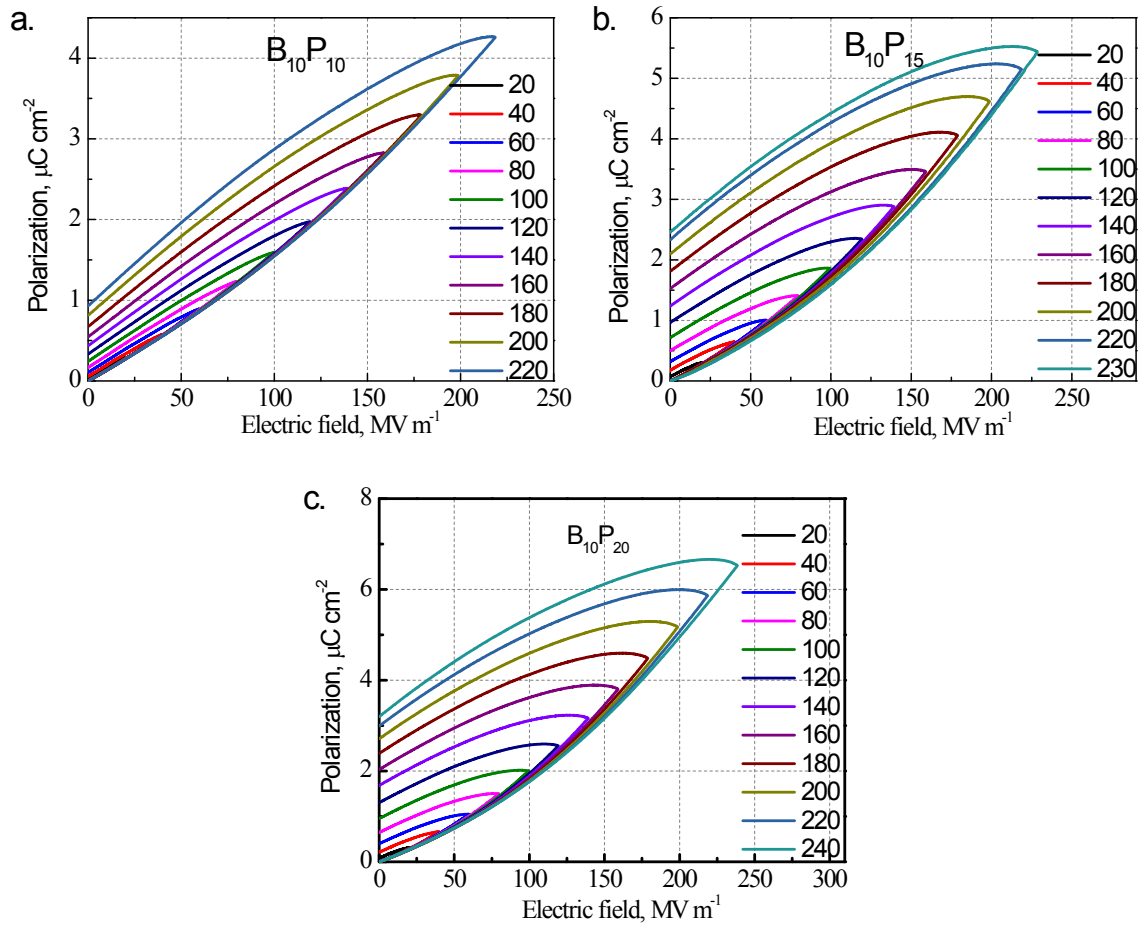

Figure S4. Unipolar D-E hysteresis loops for P(VDF-CTFE)/MPS@BT nanocomposite networks (a)  $B_{10}P_{10}$ , (b)  $B_{10}P_{15}$ , and (c)  $B_{10}P_{20}$ .
